# Supplementary material
Source: MDPI journal article supplement (https://www.mdpi.com/2073-4344/12/6/673)
Supplement: s1 [file s1]

## Supplementary material

### Activated bentonite nanocomposite for the synthesis of solketal from glycerol in liquid phase

Federico M. Perez <sup>1,2</sup>, Celeste Legarto <sup>3</sup>, María B. Lombardi <sup>3</sup>, Gerardo F. Santori <sup>1,2</sup>,  
Francisco Pompeo <sup>1,2</sup> and Nora N. Nichio <sup>1,2,\*</sup>

<sup>1</sup> *Centro de Investigación y Desarrollo en Ciencias Aplicadas (CINDECA), Facultad de Ciencias Exactas, Universidad Nacional de La Plata (UNLP) - CONICET, Calle 47, 257, CP 1900, La Plata, Argentina.*

<sup>2</sup> *Facultad de Ingeniería, Universidad Nacional de La Plata (UNLP), Calle 1 esq. 47, CP 1900, La Plata, Argentina.*

<sup>3</sup> *CETMIC (UNLP-CIC-CONICET), Camino Parque Centenario 2499-2599, Gonnet, Buenos Aires, Argentina.*

\* *Correspondence: nnichio@quimica.unlp.edu.ar*

## Kinetic model

In order to determine the kinetic expression that represents the experimental data, the Langmuir-Hinshelwood-Hougen-Watson model (LHHW) was proposed, considering the adsorption of the different compounds individually (glycerol, acetone, water or solketal) in the denominator of Eq. 1. The results at 60° are presented in Fig. S1 and Tab. S1 as an example. As solketal and water concentrations are always the same, the data treatment led to the same results for the adsorption parameters.

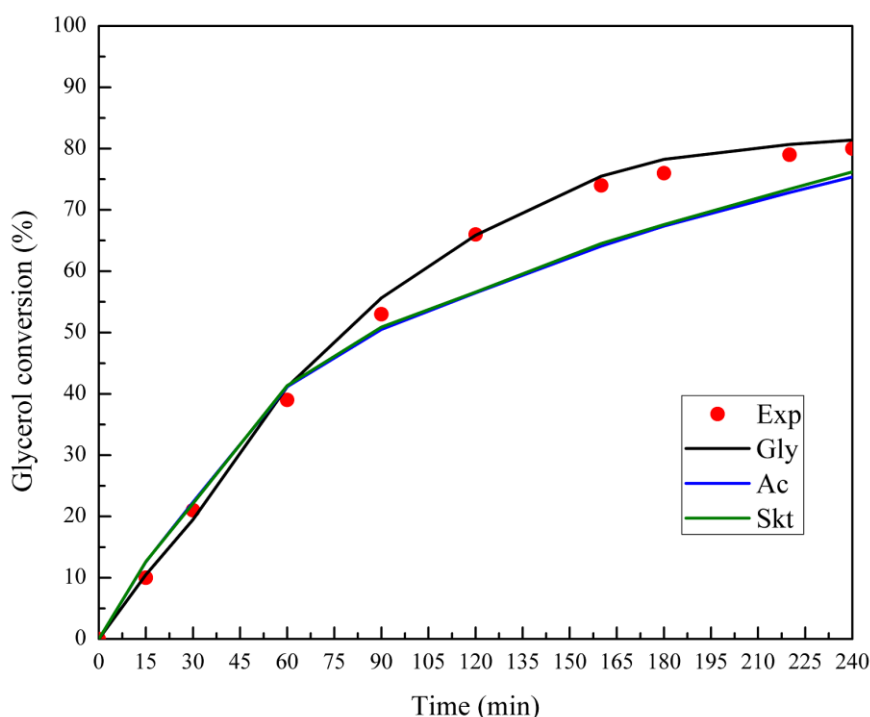

**Fig. S1.** Results of conversion vs. time considering the adsorption of different compounds.

| Parameter                                                    | Gly             | Ac                | Skt/W             |
|--------------------------------------------------------------|-----------------|-------------------|-------------------|
| $k$ [mol g <sup>-1</sup> L <sup>-1</sup> sec <sup>-1</sup> ] | 0.0905 ± 0.0538 | 21.159 ± 7363.533 | 0.01251 ± 0.00317 |
| $K_{eq}$                                                     | 0.626 ± 0.0889  | 1.680 ± 6.192     | 3.136 ± 15.759    |
| $K_i$                                                        | 1.271 ± 0.630   | 3.638 ± 648.805   | 0.00001 ± 0.288   |

**Tab. S1.** Adsorption parameters values.
